# Supplementary material for: Oleacein and Oleocanthal: Key Metabolites in the Stability of Extra Virgin Olive Oil
Source: MDPI journal article supplement (doi:10.3390/antiox12091776), 2023-09-18
Supplement: s1 [file s1]

# SUPPLEMENTARY MATERIAL

## Oleacein and oleocanthal: key metabolites in the stability of extra virgin olive oil

Alexandra Olmo-Cunillera <sup>1,2</sup>, Maria Pérez <sup>1,2</sup>, Anallely López-Yerena <sup>1</sup>, Mohamed M. Abuhabib <sup>1</sup>, Antònia Ninot <sup>3</sup>, Agustí Romero-Aroca <sup>3</sup>, Anna Vallverdú-Queralt <sup>1,2</sup>, and Rosa Maria Lamuela-Raventós <sup>1,2,\*</sup>

<sup>1</sup> Polyphenol Research Group, Department of Nutrition, Food Science and Gastronomy, Catalonia Food Innovation Network (XIA), Faculty of Pharmacy and Food Sciences, Institute of Nutrition and Food Safety (INSA-UB), University of Barcelona, 08028 Barcelona, Spain; alexandra.olmo@ub.edu; mariaperez@ub.edu; nayelopezye@ub.edu; mabuhaab8@alumnes.ub.edu; avallverdu@ub.edu

<sup>2</sup> CIBER Physiopathology of Obesity and Nutrition (CIBEROBN), Instituto de Salud Carlos III, 28029 Madrid, Spain.

<sup>3</sup> Institute of Agrifood Research and Technology (IRTA), Fruit Science Program, Olive Growing and Oil Technology Research Team, 43120 Constantí, Spain; antonia.ninot@irta.cat; agusti.romero@irta.cat

\* Correspondence: lamuela@ub.edu

**Table S1.** Concentration of fatty acids (mg/g). Results are expressed as mean  $\pm$  standard deviation, n = 9. Different letters mean significant differences ( $p < 0.05$ ) between samples with increasing letters indicating increasing values. Letters are used for the malaxation study, and Greek letters for the olive storage study.

| Sample ID                   | O1                                                  | O2                              | O3                              | O4                                                | O5                              | O6                              |
|-----------------------------|-----------------------------------------------------|---------------------------------|---------------------------------|---------------------------------------------------|---------------------------------|---------------------------------|
| Production date             | 13/10/2021                                          | 13/10/2021                      | 13/10/2021                      | 14/10/2021                                        | 14/10/2021                      | 14/10/2021                      |
| Malaxation temperature (°C) | 18                                                  | 18                              | 18                              | 18                                                | 23                              | 23                              |
| Malaxation time (min)       | 30                                                  | 40                              | 50                              | 30                                                | 30                              | 40                              |
| <i>FAs (mg/g)</i>           |                                                     |                                 |                                 |                                                   |                                 |                                 |
| C14:0                       | 0.16 $\pm$ 0.02 <sup>a,<math>\alpha</math></sup>    | 0.17 $\pm$ 0.02 <sup>a</sup>    | 0.17 $\pm$ 0.03 <sup>a</sup>    | 0.16 $\pm$ 0.02 <sup><math>\alpha</math></sup>    | 0.17 $\pm$ 0.02 <sup>a</sup>    | 0.18 $\pm$ 0.02 <sup>a</sup>    |
| C15:0                       | 0.07 $\pm$ 0.01 <sup>a,<math>\alpha</math></sup>    | 0.08 $\pm$ 0.01 <sup>a</sup>    | 0.09 $\pm$ 0.02 <sup>bc</sup>   | 0.09 $\pm$ 0.01 <sup><math>\beta</math></sup>     | 0.08 $\pm$ 0.01 <sup>ab</sup>   | 0.10 $\pm$ 0.02 <sup>c</sup>    |
| C15:1                       | 0.08 $\pm$ 0.01 <sup>a,<math>\alpha</math></sup>    | 0.10 $\pm$ 0.01 <sup>b</sup>    | 0.11 $\pm$ 0.01 <sup>b</sup>    | 0.10 $\pm$ 0.01 <sup><math>\beta</math></sup>     | 0.10 $\pm$ 0.01 <sup>a</sup>    | 0.11 $\pm$ 0.02 <sup>b</sup>    |
| C16:0                       | 97.72 $\pm$ 5.20 <sup>a,<math>\alpha</math></sup>   | 96.49 $\pm$ 2.62 <sup>a</sup>   | 96.97 $\pm$ 7.22 <sup>a</sup>   | 95.61 $\pm$ 5.36 <sup><math>\alpha</math></sup>   | 99.52 $\pm$ 4.55 <sup>a</sup>   | 102.77 $\pm$ 6.61 <sup>a</sup>  |
| C16:1 n-9                   | 0.45 $\pm$ 0.02 <sup>a,<math>\alpha</math></sup>    | 0.44 $\pm$ 0.02 <sup>a</sup>    | 0.42 $\pm$ 0.03 <sup>a</sup>    | 0.46 $\pm$ 0.02 <sup><math>\alpha</math></sup>    | 0.51 $\pm$ 0.02 <sup>b</sup>    | 0.49 $\pm$ 0.03 <sup>b</sup>    |
| C16:1 n-7                   | 4.92 $\pm$ 0.29 <sup>a,<math>\alpha</math></sup>    | 5.10 $\pm$ 0.17 <sup>abc</sup>  | 5.25 $\pm$ 0.35 <sup>abc</sup>  | 4.95 $\pm$ 0.28 <sup><math>\alpha</math></sup>    | 5.03 $\pm$ 0.26 <sup>ab</sup>   | 5.53 $\pm$ 0.42 <sup>c</sup>    |
| C17:0                       | 0.28 $\pm$ 0.02 <sup>a,<math>\alpha</math></sup>    | 0.28 $\pm$ 0.01 <sup>a</sup>    | 0.28 $\pm$ 0.02 <sup>a</sup>    | 0.28 $\pm$ 0.02 <sup><math>\alpha</math></sup>    | 0.31 $\pm$ 0.03 <sup>a</sup>    | 0.30 $\pm$ 0.03 <sup>a</sup>    |
| C17:1                       | 0.50 $\pm$ 0.03 <sup>a,<math>\alpha</math></sup>    | 0.50 $\pm$ 0.02 <sup>a</sup>    | 0.50 $\pm$ 0.04 <sup>a</sup>    | 0.51 $\pm$ 0.03 <sup><math>\alpha</math></sup>    | 0.56 $\pm$ 0.04 <sup>b</sup>    | 0.56 $\pm$ 0.03 <sup>b</sup>    |
| C18:0                       | 15.67 $\pm$ 0.84 <sup>a,<math>\alpha</math></sup>   | 15.54 $\pm$ 0.50 <sup>a</sup>   | 15.58 $\pm$ 1.06 <sup>a</sup>   | 15.12 $\pm$ 0.86 <sup><math>\alpha</math></sup>   | 15.18 $\pm$ 0.69 <sup>a</sup>   | 15.40 $\pm$ 0.97 <sup>a</sup>   |
| C18:1 n-9                   | 660.19 $\pm$ 35.30 <sup>a,<math>\alpha</math></sup> | 649.98 $\pm$ 21.45 <sup>a</sup> | 643.28 $\pm$ 47.38 <sup>a</sup> | 639.69 $\pm$ 35.78 <sup><math>\alpha</math></sup> | 662.01 $\pm$ 28.07 <sup>a</sup> | 676.46 $\pm$ 42.20 <sup>a</sup> |
| C18:2 n-6                   | 45.55 $\pm$ 2.77 <sup>a,<math>\alpha</math></sup>   | 46.67 $\pm$ 1.58 <sup>a</sup>   | 48.08 $\pm$ 3.41 <sup>a</sup>   | 50.51 $\pm$ 2.84 <sup><math>\beta</math></sup>    | 56.97 $\pm$ 2.56 <sup>b</sup>   | 53.29 $\pm$ 3.43 <sup>b</sup>   |
| C18:3 n-3                   | 4.39 $\pm$ 0.26 <sup>a,<math>\alpha</math></sup>    | 4.35 $\pm$ 0.14 <sup>a</sup>    | 4.32 $\pm$ 0.30 <sup>a</sup>    | 4.47 $\pm$ 0.25 <sup><math>\alpha</math></sup>    | 4.82 $\pm$ 0.21 <sup>b</sup>    | 4.80 $\pm$ 0.30 <sup>b</sup>    |
| C20:0                       | 2.46 $\pm$ 0.13 <sup>a,<math>\alpha</math></sup>    | 2.42 $\pm$ 0.07 <sup>a</sup>    | 2.37 $\pm$ 0.17 <sup>a</sup>    | 2.34 $\pm$ 0.13 <sup><math>\alpha</math></sup>    | 2.41 $\pm$ 0.11 <sup>a</sup>    | 2.45 $\pm$ 0.16 <sup>a</sup>    |
| C20:1 n-9                   | 1.73 $\pm$ 0.09 <sup>ab,<math>\alpha</math></sup>   | 1.71 $\pm$ 0.06 <sup>ab</sup>   | 1.67 $\pm$ 0.12 <sup>a</sup>    | 1.71 $\pm$ 0.10 <sup><math>\alpha</math></sup>    | 1.84 $\pm$ 0.09 <sup>b</sup>    | 1.82 $\pm$ 0.12 <sup>b</sup>    |
| C20:2 n-6                   | 0.35 $\pm$ 0.04 <sup>c,<math>\beta</math></sup>     | 0.26 $\pm$ 0.03 <sup>a</sup>    | 0.31 $\pm$ 0.05 <sup>bc</sup>   | 0.27 $\pm$ 0.03 <sup><math>\alpha</math></sup>    | 0.29 $\pm$ 0.03 <sup>ab</sup>   | 0.27 $\pm$ 0.03 <sup>ab</sup>   |
| C21:0                       | 0.07 $\pm$ 0.02 <sup>b,<math>\alpha</math></sup>    | 0.06 $\pm$ 0.00 <sup>ab</sup>   | 0.05 $\pm$ 0.00 <sup>a</sup>    | 0.06 $\pm$ 0.01 <sup><math>\alpha</math></sup>    | 0.06 $\pm$ 0.01 <sup>ab</sup>   | 0.06 $\pm$ 0.00 <sup>ab</sup>   |
| C22:0                       | 0.82 $\pm$ 0.05 <sup>b,<math>\beta</math></sup>     | 0.73 $\pm$ 0.03 <sup>a</sup>    | 0.70 $\pm$ 0.05 <sup>a</sup>    | 0.70 $\pm$ 0.04 <sup><math>\alpha</math></sup>    | 0.74 $\pm$ 0.03 <sup>a</sup>    | 0.73 $\pm$ 0.05 <sup>a</sup>    |

|                |                               |                             |                             |                             |                             |                             |
|----------------|-------------------------------|-----------------------------|-----------------------------|-----------------------------|-----------------------------|-----------------------------|
| C22:1 n-9      | 0.14 ± 0.05 <sup>b,β</sup>    | 0.06 ± 0.01 <sup>a</sup>    | 0.04 ± 0.00 <sup>a</sup>    | 0.05 ± 0.01 <sup>α</sup>    | 0.05 ± 0.01 <sup>a</sup>    | 0.04 ± 0.01 <sup>a</sup>    |
| C22:2 n-6      | 0.27 ± 0.06 <sup>b,β</sup>    | 0.17 ± 0.02 <sup>a</sup>    | 0.14 ± 0.01 <sup>a</sup>    | 0.15 ± 0.02 <sup>α</sup>    | 0.16 ± 0.01 <sup>a</sup>    | 0.16 ± 0.02 <sup>a</sup>    |
| C23:0          | 0.25 ± 0.11 <sup>b,β</sup>    | 0.14 ± 0.03 <sup>a</sup>    | 0.11 ± 0.03 <sup>a</sup>    | 0.13 ± 0.03 <sup>α</sup>    | 0.11 ± 0.02 <sup>a</sup>    | 0.13 ± 0.02 <sup>a</sup>    |
| C24:0          | 0.81 ± 0.14 <sup>b,β</sup>    | 0.55 ± 0.04 <sup>a</sup>    | 0.49 ± 0.03 <sup>a</sup>    | 0.50 ± 0.03 <sup>α</sup>    | 0.52 ± 0.02 <sup>a</sup>    | 0.52 ± 0.04 <sup>a</sup>    |
| Sum of FAs     | 836.88 ± 44.66 <sup>a,α</sup> | 825.82 ± 26.68 <sup>a</sup> | 820.96 ± 60.15 <sup>a</sup> | 817.80 ± 45.78 <sup>α</sup> | 851.49 ± 36.53 <sup>a</sup> | 866.36 ± 54.46 <sup>a</sup> |
| SFA            | 118.30 ± 6.04 <sup>a,α</sup>  | 116.48 ± 3.29 <sup>a</sup>  | 116.82 ± 8.56 <sup>a</sup>  | 114.98 ± 6.43 <sup>α</sup>  | 119.13 ± 5.39 <sup>a</sup>  | 122.63 ± 7.85 <sup>a</sup>  |
| MUFA           | 668.01 ± 35.70 <sup>a,α</sup> | 657.89 ± 21.70 <sup>a</sup> | 651.28 ± 47.92 <sup>a</sup> | 647.47 ± 36.20 <sup>α</sup> | 670.11 ± 28.39 <sup>a</sup> | 685.20 ± 42.86 <sup>a</sup> |
| PUFA           | 50.57 ± 2.98 <sup>a,α</sup>   | 51.45 ± 1.75 <sup>a</sup>   | 52.86 ± 3.70 <sup>a</sup>   | 55.35 ± 3.16 <sup>β</sup>   | 62.24 ± 2.78 <sup>b</sup>   | 58.53 ± 3.76 <sup>b</sup>   |
| MUFA/PUFA      | 13.21 ± 0.17 <sup>e,β</sup>   | 12.79 ± 0.05 <sup>d</sup>   | 12.32 ± 0.08 <sup>c</sup>   | 11.70 ± 0.04 <sup>α</sup>   | 10.77 ± 0.04 <sup>a</sup>   | 11.71 ± 0.03 <sup>b</sup>   |
| oleic/linoleic | 14.50 ± 0.20 <sup>e,β</sup>   | 13.93 ± 0.05 <sup>d</sup>   | 13.38 ± 0.08 <sup>c</sup>   | 12.66 ± 0.03 <sup>α</sup>   | 11.62 ± 0.04 <sup>a</sup>   | 12.69 ± 0.03 <sup>b</sup>   |

---

**Table S2.** Fatty acid composition (%). Results are expressed as mean  $\pm$  standard deviation, n = 9.

| FAs (%)   | O1               | O2               | O3               | O4               | O5               | O6               |
|-----------|------------------|------------------|------------------|------------------|------------------|------------------|
| C14:0     | 0.02 $\pm$ 0.00  |
| C15:0     | 0.01 $\pm$ 0.00  | 0.01 $\pm$ 0.00  | 0.01 $\pm$ 0.00  | 0.02 $\pm$ 0.00  | 0.01 $\pm$ 0.00  | 0.01 $\pm$ 0.00  |
| C15:1     | 0.01 $\pm$ 0.00  |
| C16:0     | 11.68 $\pm$ 0.04 | 11.69 $\pm$ 0.08 | 11.81 $\pm$ 0.06 | 11.69 $\pm$ 0.04 | 11.69 $\pm$ 0.07 | 11.86 $\pm$ 0.03 |
| C16:1 n-9 | 0.05 $\pm$ 0.00  | 0.05 $\pm$ 0.00  | 0.05 $\pm$ 0.00  | 0.06 $\pm$ 0.00  | 0.06 $\pm$ 0.00  | 0.06 $\pm$ 0.00  |
| C16:1 n-7 | 0.59 $\pm$ 0.01  | 0.62 $\pm$ 0.00  | 0.64 $\pm$ 0.01  | 0.61 $\pm$ 0.00  | 0.59 $\pm$ 0.02  | 0.64 $\pm$ 0.02  |
| C17:0     | 0.03 $\pm$ 0.00  | 0.03 $\pm$ 0.00  | 0.03 $\pm$ 0.00  | 0.03 $\pm$ 0.00  | 0.04 $\pm$ 0.00  | 0.03 $\pm$ 0.00  |
| C17:1     | 0.06 $\pm$ 0.00  | 0.06 $\pm$ 0.00  | 0.06 $\pm$ 0.00  | 0.06 $\pm$ 0.00  | 0.07 $\pm$ 0.00  | 0.06 $\pm$ 0.00  |
| C18:0     | 1.87 $\pm$ 0.02  | 1.88 $\pm$ 0.01  | 1.90 $\pm$ 0.02  | 1.85 $\pm$ 0.00  | 1.78 $\pm$ 0.01  | 1.78 $\pm$ 0.01  |
| C18:1 n-9 | 78.89 $\pm$ 0.09 | 78.71 $\pm$ 0.09 | 78.35 $\pm$ 0.09 | 78.22 $\pm$ 0.04 | 77.75 $\pm$ 0.08 | 78.08 $\pm$ 0.1  |
| C18:2 n-6 | 5.44 $\pm$ 0.07  | 5.65 $\pm$ 0.02  | 5.86 $\pm$ 0.03  | 6.18 $\pm$ 0.02  | 6.69 $\pm$ 0.02  | 6.15 $\pm$ 0.01  |
| C18:3 n-3 | 0.52 $\pm$ 0.01  | 0.53 $\pm$ 0.00  | 0.53 $\pm$ 0.01  | 0.55 $\pm$ 0.00  | 0.57 $\pm$ 0.00  | 0.55 $\pm$ 0.00  |
| C20:0     | 0.29 $\pm$ 0.00  | 0.29 $\pm$ 0.00  | 0.29 $\pm$ 0.00  | 0.29 $\pm$ 0.00  | 0.28 $\pm$ 0.00  | 0.28 $\pm$ 0.00  |
| C20:1 n-9 | 0.21 $\pm$ 0.00  | 0.21 $\pm$ 0.00  | 0.20 $\pm$ 0.00  | 0.21 $\pm$ 0.00  | 0.22 $\pm$ 0.01  | 0.21 $\pm$ 0.00  |
| C20:2 n-6 | 0.04 $\pm$ 0.01  | 0.03 $\pm$ 0.00  | 0.04 $\pm$ 0.01  | 0.03 $\pm$ 0.00  | 0.03 $\pm$ 0.00  | 0.03 $\pm$ 0.00  |
| C21:0     | 0.01 $\pm$ 0.00  |
| C22:0     | 0.10 $\pm$ 0.01  | 0.09 $\pm$ 0.00  | 0.08 $\pm$ 0.00  | 0.09 $\pm$ 0.00  | 0.09 $\pm$ 0.00  | 0.08 $\pm$ 0.00  |
| C22:1 n-9 | 0.02 $\pm$ 0.01  | 0.01 $\pm$ 0.00  | 0.01 $\pm$ 0.00  | 0.01 $\pm$ 0.00  | 0.01 $\pm$ 0.00  | 0.00 $\pm$ 0.00  |
| C22:2 n-6 | 0.03 $\pm$ 0.01  | 0.02 $\pm$ 0.00  |
| C23:0     | 0.03 $\pm$ 0.01  | 0.02 $\pm$ 0.00  | 0.01 $\pm$ 0.00  | 0.02 $\pm$ 0.00  | 0.01 $\pm$ 0.00  | 0.01 $\pm$ 0.00  |
| C24:0     | 0.10 $\pm$ 0.02  | 0.07 $\pm$ 0.00  | 0.06 $\pm$ 0.00  | 0.06 $\pm$ 0.00  | 0.06 $\pm$ 0.00  | 0.06 $\pm$ 0.00  |
